# Supplementary material for: Patterns of First Recurrence and Oncological Outcomes in Locally Advanced Cervical Cancer Patients: Does Surgical Staging Play a Role?
Source: MDPI journal article supplement (doi:10.3390/cancers16071423), 2024-04-06
Supplement: s1 [file s1]

Supplementary material

Oncological outcomes: Overall, cancer specific and disease free survival analysis by FIGO stage (Stage IIB, III).

1. FIGO IIB

1.1. Overall survival

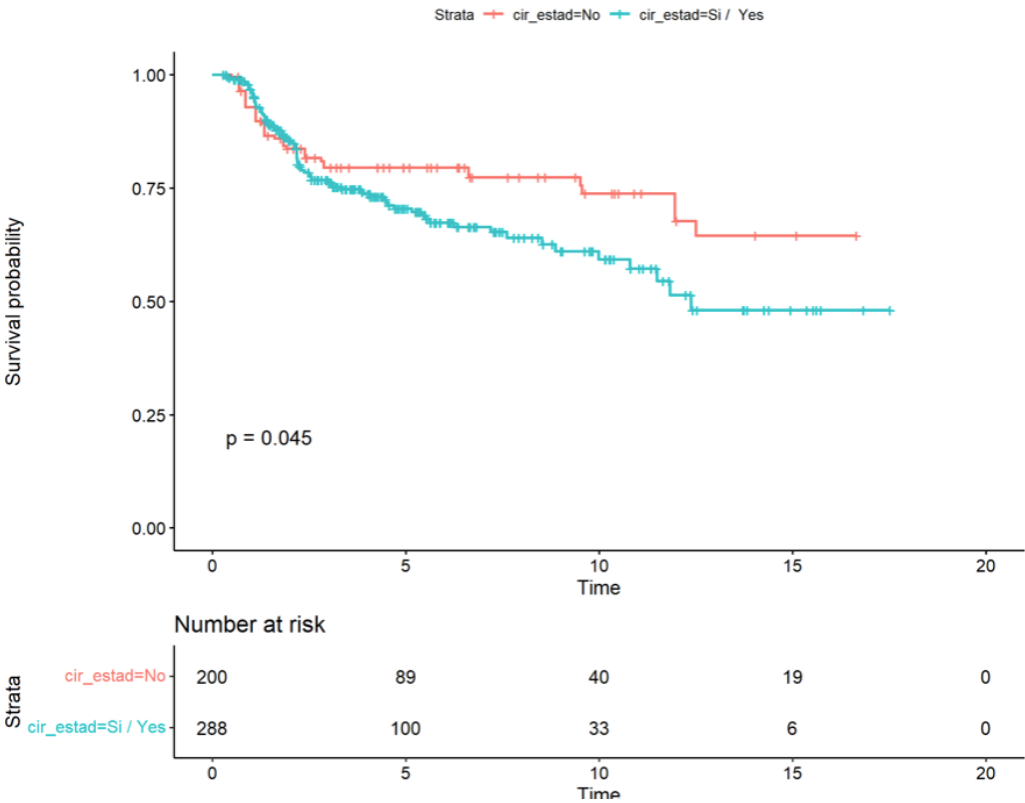

## No PALND

| ## | time | n.risk | n.event | survival | std.err | lower 95% CI | upper 95% CI |
|----|------|--------|---------|----------|---------|--------------|--------------|
| ## | 2    | 139    | 31      | 0.837    | 0.0269  | 0.785        | 0.891        |
| ## | 5    | 89     | 6       | 0.795    | 0.0305  | 0.738        | 0.857        |
| ## | 10   | 40     | 4       | 0.738    | 0.0401  | 0.664        | 0.821        |

## PALND

| ## | time | n.risk | n.event | survival | std.err | lower 95% CI | upper 95% CI |
|----|------|--------|---------|----------|---------|--------------|--------------|
| ## | 2    | 202    | 39      | 0.854    | 0.0217  | 0.812        | 0.897        |
| ## | 5    | 100    | 31      | 0.705    | 0.0306  | 0.647        | 0.768        |
| ## | 10   | 33     | 10      | 0.593    | 0.0430  | 0.514        | 0.684        |

1.2. Cancer specific survival

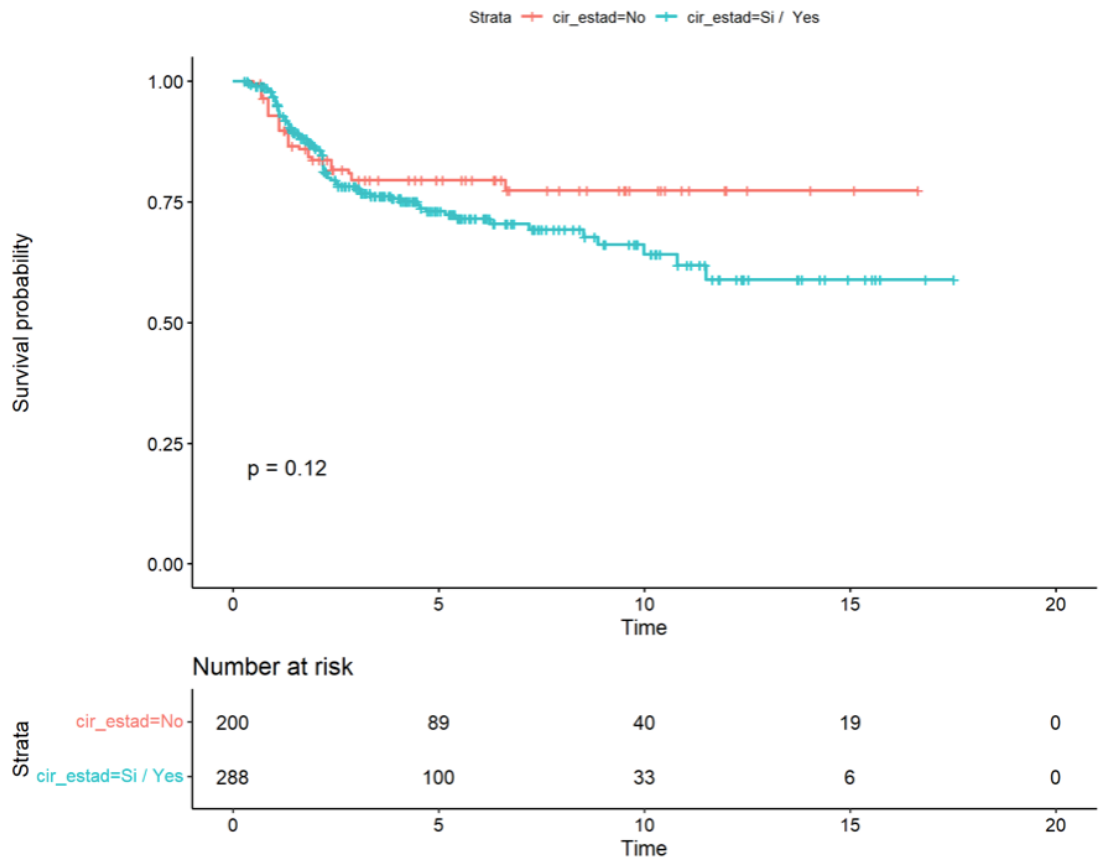

|            |      |        |         |          |         |              |              |
|------------|------|--------|---------|----------|---------|--------------|--------------|
| ## NoPALND |      |        |         |          |         |              |              |
| ##         | time | n.risk | n.event | survival | std.err | lower 95% CI | upper 95% CI |
| ##         | 2    | 139    | 31      | 0.837    | 0.0269  | 0.785        | 0.891        |
| ##         | 5    | 89     | 6       | 0.795    | 0.0305  | 0.738        | 0.857        |
| ##         | 10   | 40     | 2       | 0.774    | 0.0331  | 0.712        | 0.842        |
| ##         |      |        |         |          |         |              |              |
| ## PALND   |      |        |         |          |         |              |              |
| ##         | time | n.risk | n.event | survival | std.err | lower 95% CI | upper 95% CI |
| ##         | 2    | 202    | 37      | 0.861    | 0.0213  | 0.820        | 0.904        |
| ##         | 5    | 100    | 27      | 0.731    | 0.0297  | 0.675        | 0.791        |
| ##         | 10   | 33     | 7       | 0.642    | 0.0424  | 0.564        | 0.731        |

1.3. Disease free survival

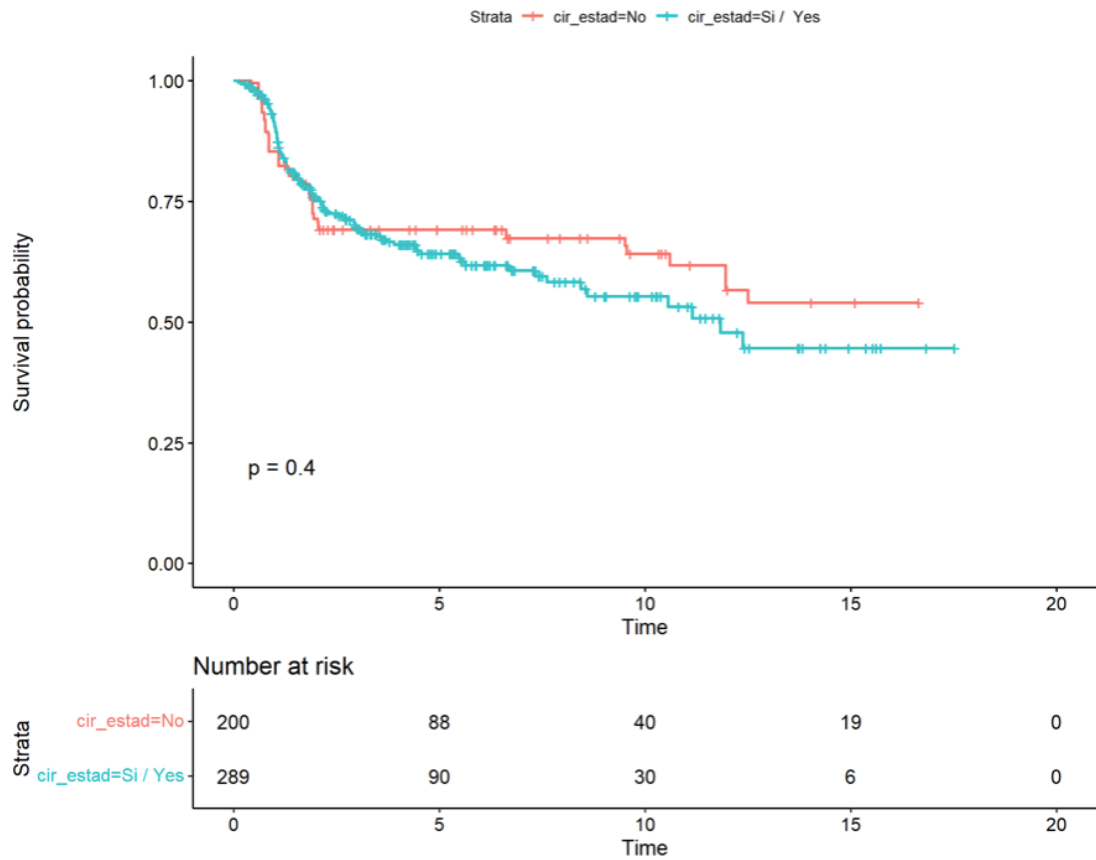

## NoPALND

## time n.risk n.event survival std.err lower 95% CI upper 95% CI

## 2 127 55 0.714 0.0328 0.653 0.781

## 5 88 4 0.692 0.0336 0.629 0.761

## 10 40 4 0.642 0.0398 0.569 0.725

##

## PALND

## time n.risk n.event survival std.err lower 95% CI upper 95% CI

## 2 180 65 0.759 0.0261 0.710 0.812

## 5 90 24 0.641 0.0315 0.582 0.706

## 10 30 8 0.554 0.0404 0.480 0.639

2. FIGO III

2.1. Overall survival

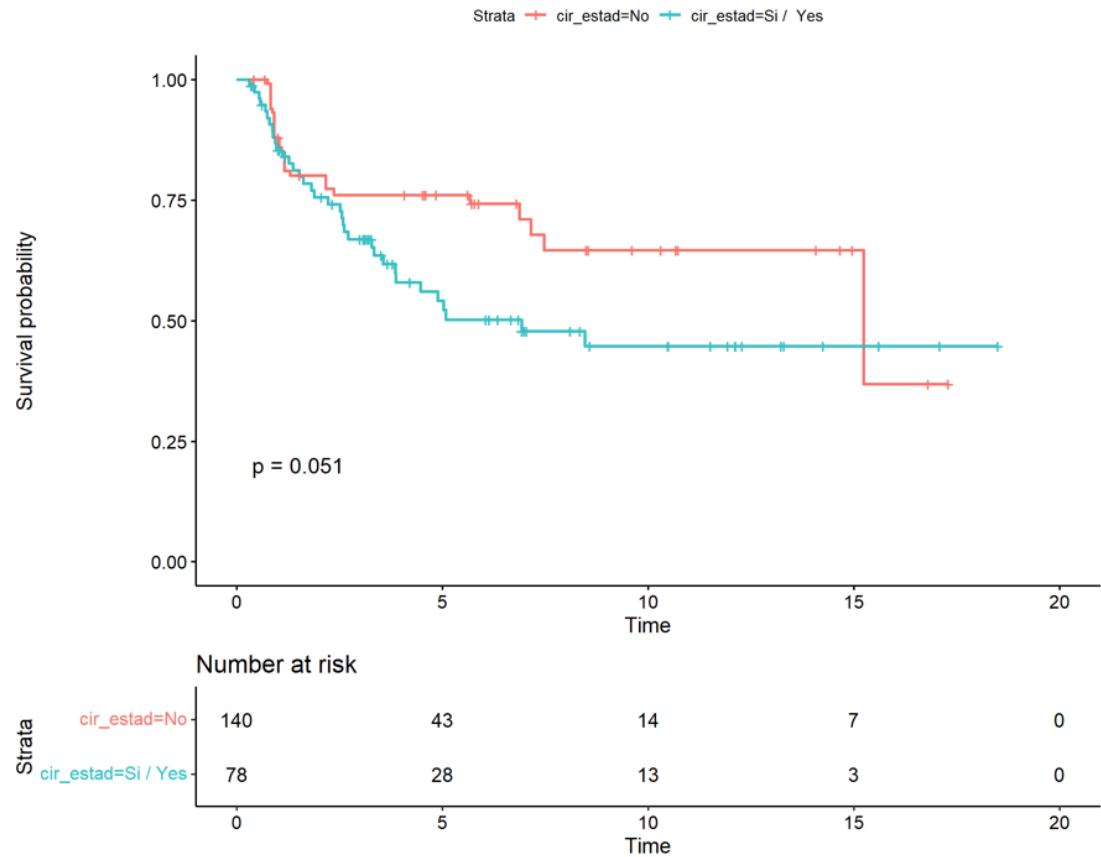

## NoPALND

## time n.risk n.event survival std.err lower 95% CI upper 95% CI

## 2 59 24 0.802 0.0368 0.732 0.877

## 5 43 3 0.761 0.0418 0.683 0.847

## 10 14 4 0.646 0.0650 0.530 0.787

##

## PALND

## time n.risk n.event survival std.err lower 95% CI upper 95% CI

## 2 54 18 0.756 0.0501 0.664 0.861

## 5 28 13 0.541 0.0626 0.431 0.679

## 10 13 4 0.447 0.0682 0.331 0.603

2.2. Cancer specific survival

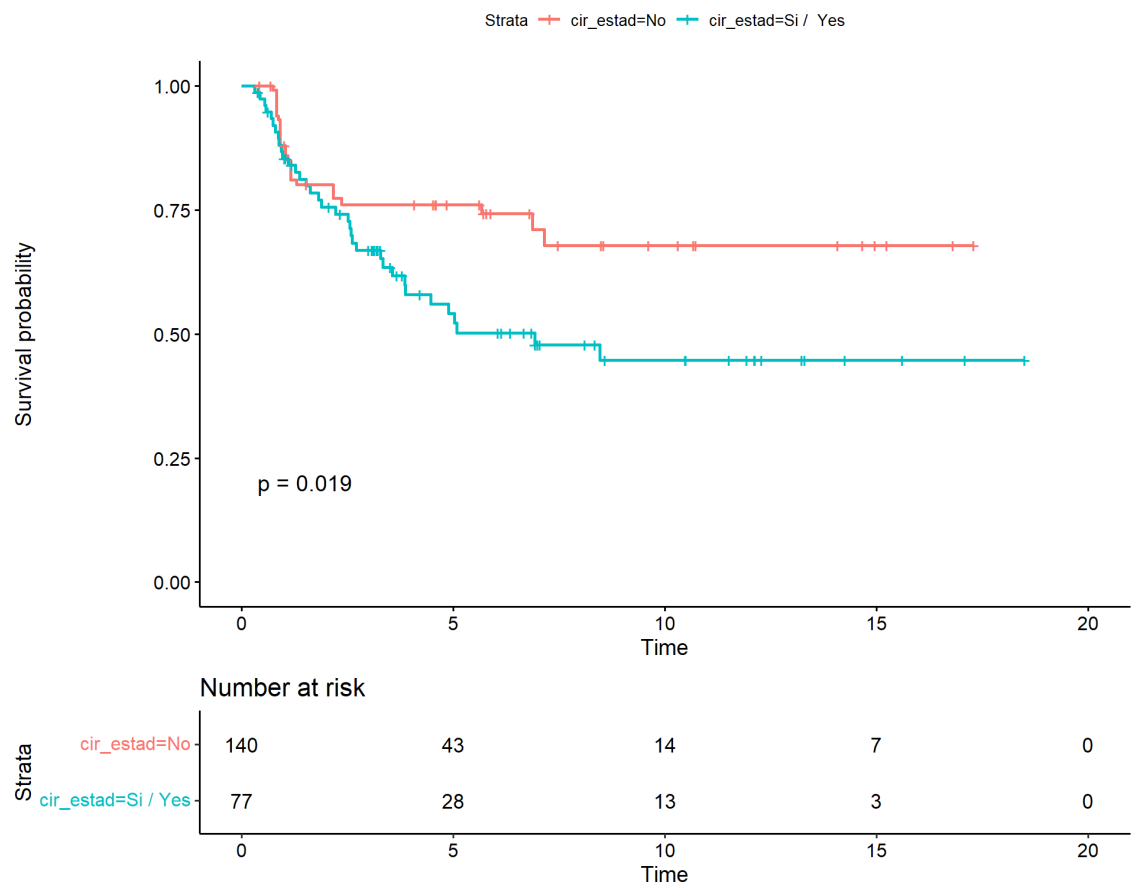

## NoPALND

## time n.risk n.event survival std.err lower 95% CI upper 95% CI

## 2 59 24 0.802 0.0368 0.732 0.877

## 5 43 3 0.761 0.0418 0.683 0.847

## 10 14 3 0.678 0.0597 0.571 0.806

##

## PALND

## time n.risk n.event survival std.err lower 95% CI upper 95% CI

## 2 54 18 0.756 0.0501 0.664 0.861

## 5 28 13 0.541 0.0626 0.431 0.679

## 10 13 4 0.447 0.0682 0.331 0.602

2.3. Disease free survival

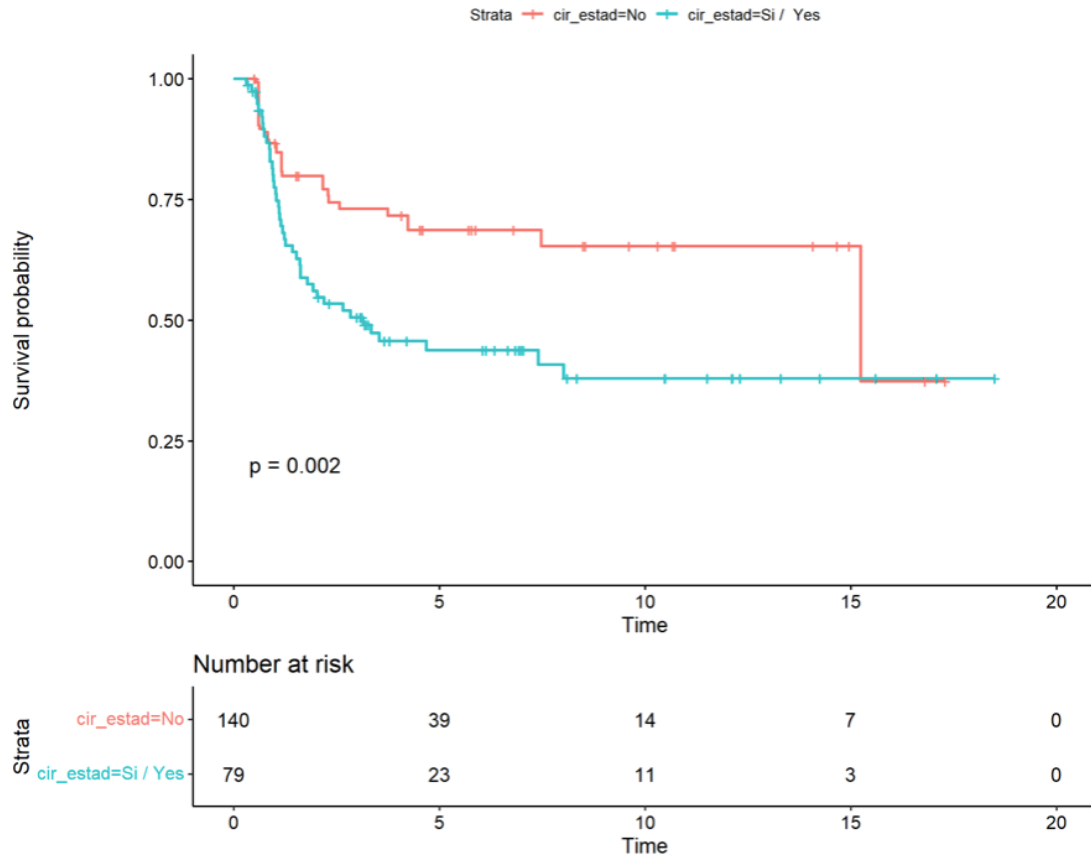

## NoPALND

## time n.risk n.event survival std.err lower 95% CI upper 95% CI

## 2 58 25 0.799 0.0364 0.731 0.874

## 5 39 8 0.687 0.0484 0.598 0.788

## 10 14 1 0.654 0.0561 0.553 0.774

##

## PALND

## time n.risk n.event survival std.err lower 95% CI upper 95% CI

## 2 42 33 0.561 0.0573 0.459 0.685

## 5 23 8 0.438 0.0594 0.335 0.571

## 10 11 2 0.379 0.0642 0.272 0.529
